# Supplementary material for: Ionic electroactive PEDOT:PSS/liquid-crystalline polymer electrolyte actuators: photopolymerization of zwitterionic columnar liquid crystals complexed with a protic ionic liquid
Source: Royal Society of Chemistry journal article supplement (doi:10.1039/d3qm00192j), 2023-01-01
Supplement: d3qm00192j1.pdf [file d3qm00192j1.pdf]

1 **Electronic Supplementary Information**

2 for

3 **Ionic electroactive PEDOT:PSS/liquid-crystalline polymer**  
4 **electrolyte actuators: Photopolymerization of zwitterionic**  
5 **columnar liquid crystals complexed with a protic ionic liquid**  
6

7 Siyu Cao, Chengyang Liu, and Masafumi Yoshio\*

8 Molecular Mechatronics Group, Research Center for Macromolecules & Biomaterials,  
9 National Institute for Materials Science, Tsukuba, Ibaraki 305-0047, Japan; Graduate School  
10 of Chemical Sciences and Engineering, Hokkaido University, Sapporo, Hokkaido 060-8628,  
11 Japan

12 \*E-mail: YOSHIO.Masafumi@nims.go.jp

13

14

15

16

17

18

19

20

21

22

23

24

# 1 Characterization of liquid crystallinity

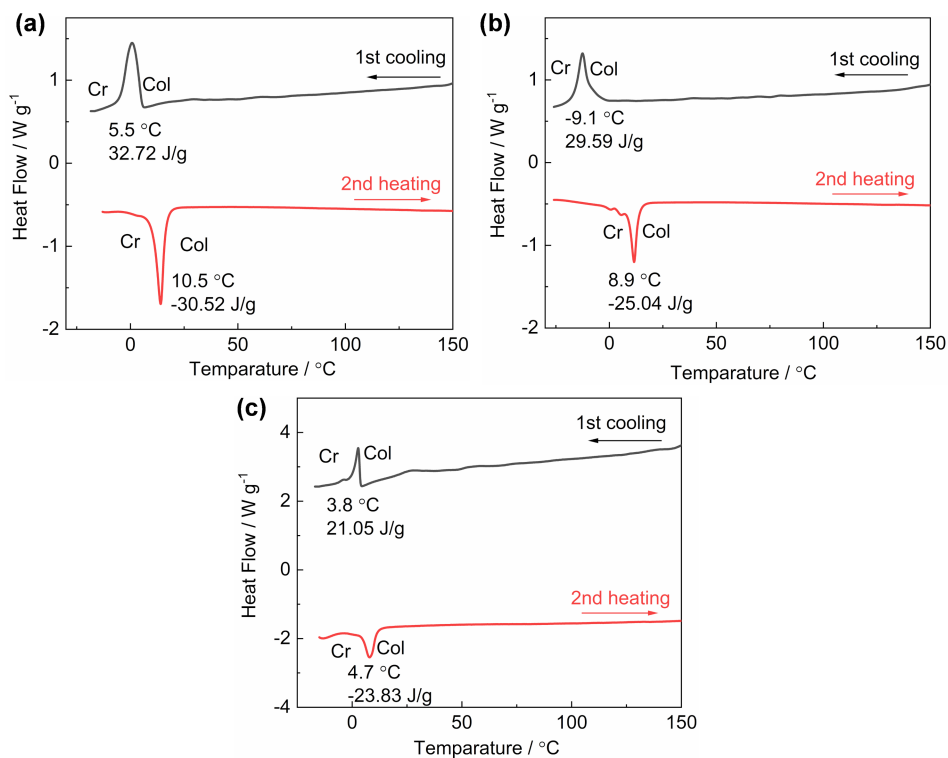

2 **Fig. S1** DSC thermograms of (a) **M1/2(40)**, (b) **M1/2(50)**, and (c) **M1/2(60)**. The transition  
3 temperatures were taken at the peak tops.

4

5

6

7

8

9

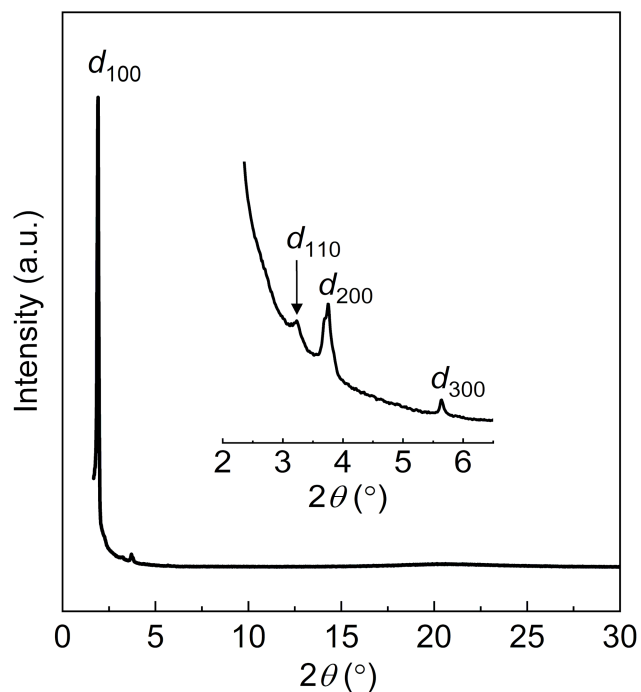

1 **Fig. S2** XRD pattern of **M1/2(50)** at room temperature.

2 The number of molecules ( $n$ ) per cross-sectional slice of the column for **M1/2(50)** was  
 3 estimated as 10 using the equation  $n = (\sqrt{3}N_A a^2 h \rho) / 2M$ , where  $N_A$  is Avogadro's number  
 4 ( $6.02 \times 10^{23} \text{ mol}^{-1}$ ),  $\rho$  is density,  $M$  is molecular weight, and  $h$  is the average height of the  
 5 stratum;  $h$  was estimated as 4.4 Å from the position of a halo at  $2\theta = 20^\circ$ .  $\rho$  was estimated as  
 6  $1.0 \text{ g cm}^{-3}$ .

7

8

1 **2. *In situ* photopolymerization of the LC mixtures**

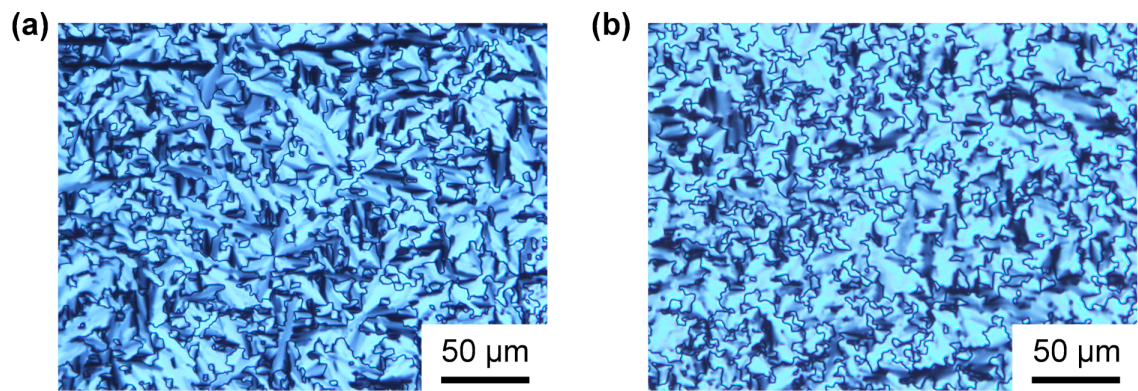

2 **Fig. S3** Polarizing optical micrographs at room temperature: (a) **M1/2(50)** and (b) **P1/2(50)**.

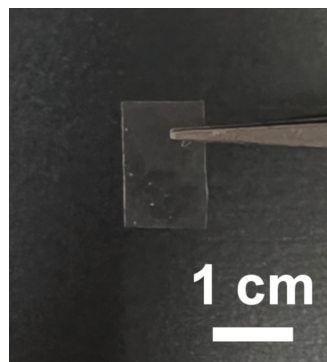

3 **Fig. S4** Photograph of a free-standing polymer film of **P1/2(50)**.

4

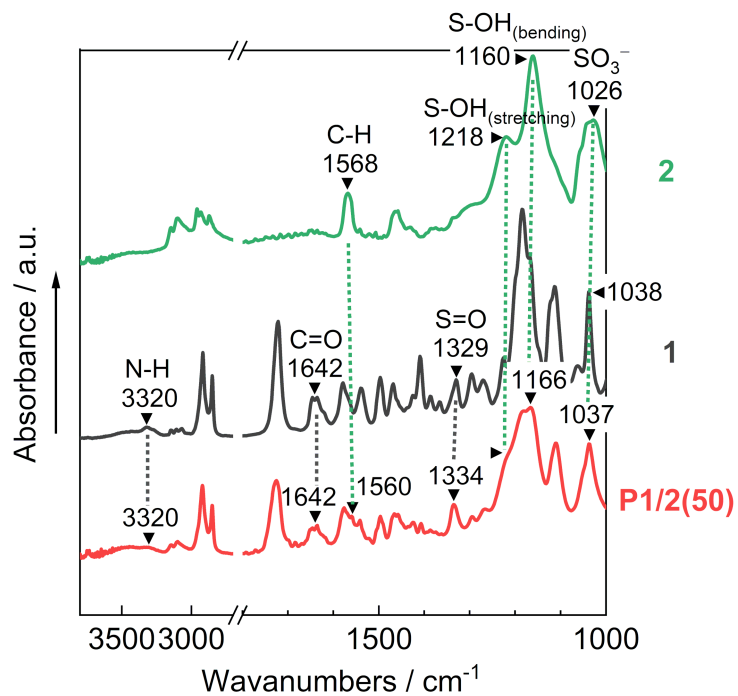

1 **Fig. S5** FT-IR spectra of **2** (green line), **1** (black line), and **P1/2 (50)** (red line) at room  
 2 temperature.

3

4

5

6

7

8

9

10

11

### 1 3. Ionic Conductivity

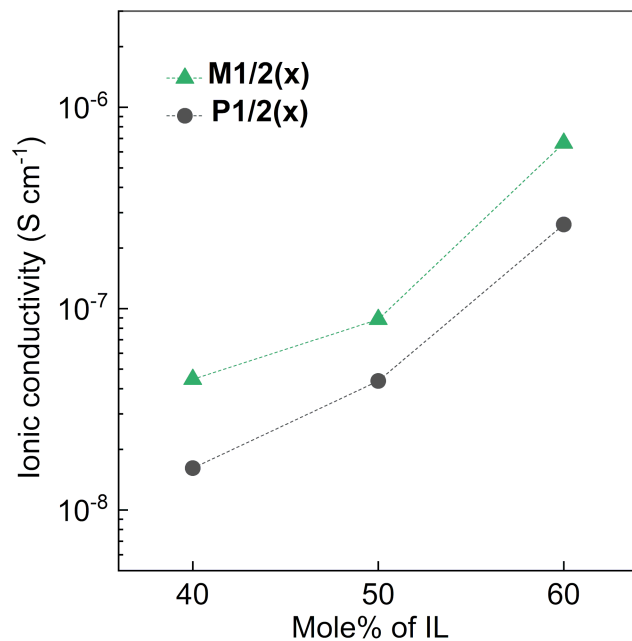

2 **Fig. S6** Ionic conductivities of **M1/2(x)** and polymer films **P1/2(x)** at room temperature.

3

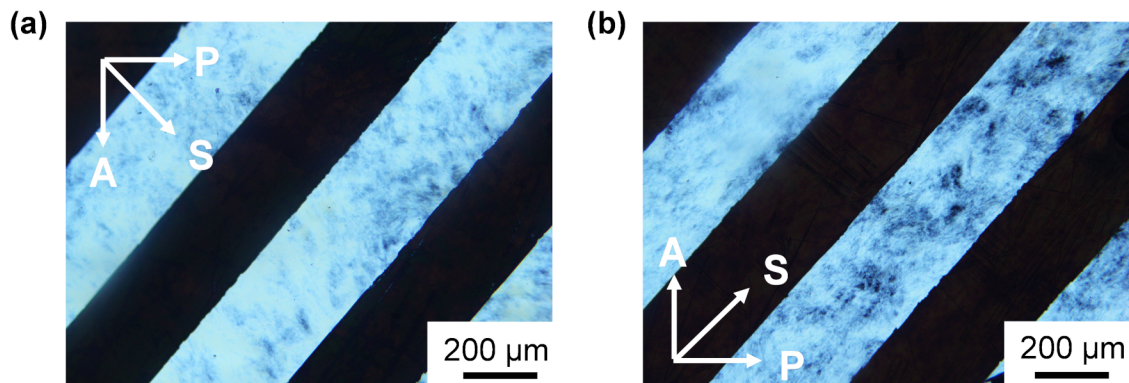

4 **Fig. S7** POM images of aligned **M1/2(50)** between comb-shaped gold electrodes at ambient  
5 conditions: (a) perpendicular orientation of the columnar axis to the direction of electrodes  
6 (⊥); (b) parallel orientation of the columnar axis to the direction of electrodes (//).

1

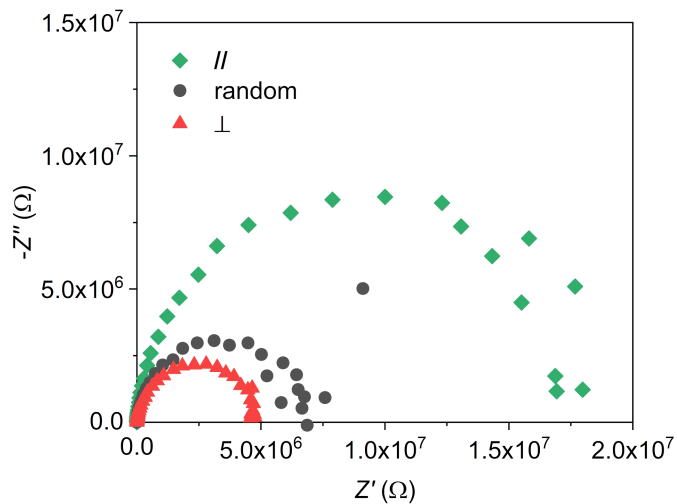

2 **Fig. S8** Nyquist plots of **M1/2(50)** with random orientation and uniaxially planar orientation  
3 of columns between comb-shaped gold electrodes at ambient conditions. // and  $\perp$  indicates  
4 that the columnar axis is parallel and perpendicular to the direction of gold electrodes,  
5 respectively.

6

#### 7 **4. Actuation Performance**

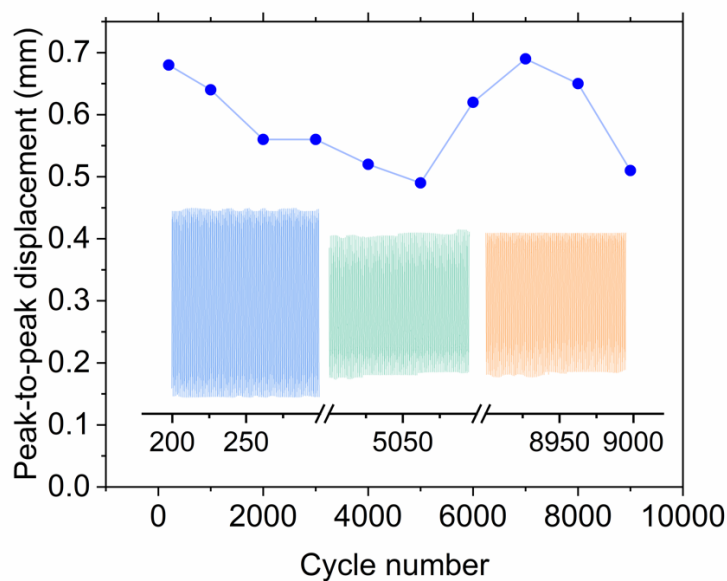

8

9 **Fig. S9** Cycle stability of the bending actuation for the **P1/2(50)**-based actuator under 2 V at 1 Hz.

1

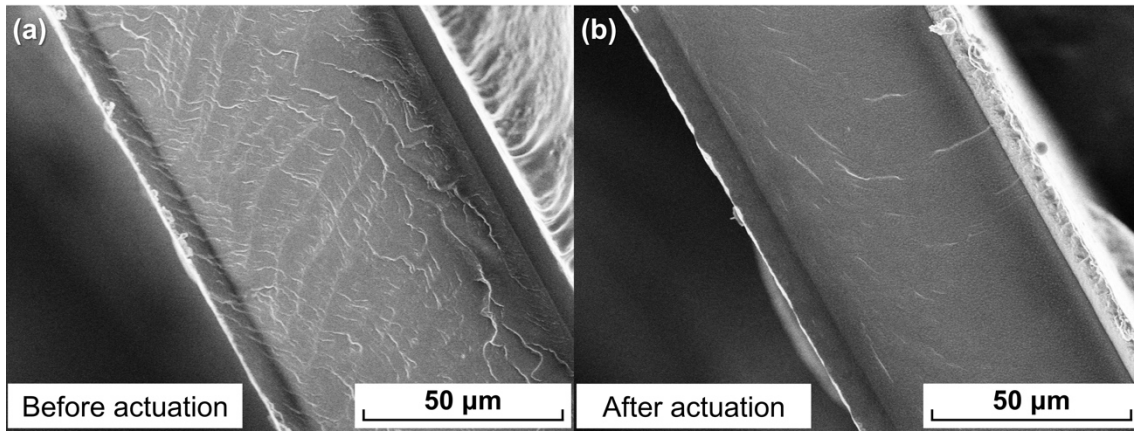

2

3 **Fig. S10** SEM images of the cross-section of the **P1/2(50)**-based actuator before and after long-term  
4 actuation experiment.

5

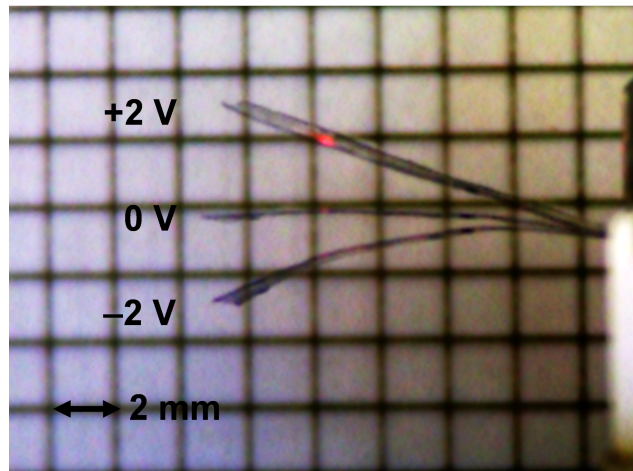

6 **Fig. S11** Photograph of the **P1/2(50)**-based actuator under an AC voltage of 2 V at 0.1 Hz.  
7 The thickness of actuator is 68 μm.



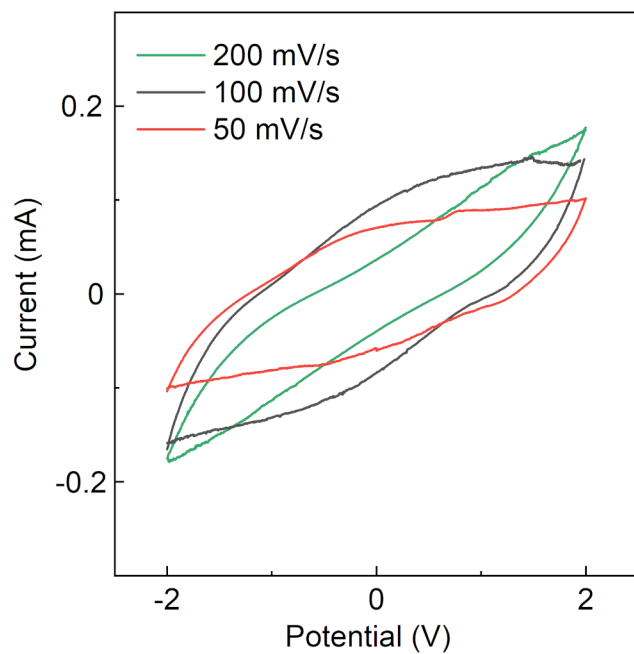

1 **Fig. S12** Cyclic voltammograms of the **P1/2(50)** actuator under a potential window between  
2 +2 and -2 V at scan rates of 200, 100, and 50 mV s<sup>-1</sup> under ambient condition. The electrolyte  
3 thickness of **P1/2(50)** is 57 μm.

4

5

6

7

8

9

10

11

12

13

14

1 **Table S1.** Summary of bending strains and blocking forces between different actuators.

| Electrolyte                                                      | Electrode                                                                 | IL (wt%)                                                                        | V <sub>AC</sub> (V) | Frequency (Hz) | Bending strain (%) | V <sub>DC</sub> (V) | Blocking force (mN) | Normalized force <sup>d</sup> (kPa) |
|------------------------------------------------------------------|---------------------------------------------------------------------------|---------------------------------------------------------------------------------|---------------------|----------------|--------------------|---------------------|---------------------|-------------------------------------|
| This work                                                        |                                                                           |                                                                                 |                     |                |                    |                     |                     |                                     |
| <b>75-<math>\mu</math>m-thick P1/2(60)</b>                       | PEDOT:PSS                                                                 | [BMIM] <sup>+</sup> [HSO <sub>4</sub> ] <sup>-</sup><br>24.8 wt%                | 2                   | 0.1            | 0.67               | 2                   | 4.68                | 1170                                |
| <b>75-<math>\mu</math>m-thick P1/2(50)</b>                       | PEDOT:PSS                                                                 | 18.1 wt%                                                                        | 2                   | 0.01           | 0.86               | 1                   | 1.45                | 337                                 |
| <b>75-<math>\mu</math>m-thick P1/2(40)</b>                       | PEDOT:PSS                                                                 | 12.8 wt%                                                                        | 2                   | 0.01           | 0.59               | 1                   | 1.24                | 372                                 |
| 1D columnar LC membrane [S1]                                     | PEDOT:PSS                                                                 | [EMIM] <sup>+</sup> [BF <sub>4</sub> ] <sup>-</sup><br>7.9 wt%                  | 2                   | 0.01           | 0.20               | 2                   | 0.27                | 392                                 |
| 3D columnar LC membrane [S2]                                     | PEDOT:PSS                                                                 | [EMIM] <sup>+</sup> [BF <sub>4</sub> ] <sup>-</sup><br>5.6 wt%                  | 2                   | 0.01           | 0.81               | 2                   | 1.10                | 204                                 |
| 3D LC/polymer composite membrane [S3]                            | PEDOT:PSS                                                                 | [BMIM] <sup>+</sup> [CF <sub>3</sub> SO <sub>3</sub> ] <sup>-</sup><br>27.5 wt% | 1                   | 0.1            | 0.32               | 2                   | 0.27                | 42                                  |
| PVDF [S4]                                                        | Ni-CAT NWAs/CNF                                                           | [EMIM] <sup>+</sup> [TFSI] <sup>-</sup><br>60 wt%                               | 3                   | 0.1            | 0.36               | 3 <sup>b</sup>      | 1.45                | 1510                                |
| Cellulose [S5]                                                   | PEDOT:PSS                                                                 | [EMIM] <sup>+</sup> [BF <sub>4</sub> ] <sup>-</sup><br>70 wt%                   | 2                   | 0.1            | 0.28               | 2                   | 1.01                | 606                                 |
| Block copolymer (PSS-b-PMB) [S6]                                 | P(VdF-HFP)/SWCNTs/<br>[EMIM] <sup>+</sup> [BF <sub>4</sub> ] <sup>-</sup> | Zlms<br>50 mol%                                                                 | 2                   | 0.5            | 0.87               | 1                   | 0.3                 | 516                                 |
| Polyimide-Nafion [S7]                                            | Pt                                                                        | -                                                                               | 3                   | 0.1            | 0.28               | 3                   | 5.93                | 272                                 |
| Nafion 117 [S7]                                                  | Pt                                                                        | -                                                                               | 3                   | 0.1            | 0.21               | 3                   | 6.86                | 233                                 |
| Sulfonated polyimide [S8]                                        | Carbon composite                                                          | [EMIM] <sup>+</sup> [TFSI] <sup>-</sup><br>50-75 wt%                            | 1.5                 | 0.05           | 0.19               | 3                   | 0.67                | 268                                 |
| Thermoplastic polyurethane [S9]                                  | PEDOT:PSS/IL/DMSO                                                         | [EMIM] <sup>+</sup> [TFSI] <sup>-</sup><br>80 wt%                               | 2                   | 0.1            | 0.61               | 2 <sup>c</sup>      | 0.3                 | 101                                 |
| Nafion [S10]                                                     | Molybdenum-disulfide/<br>Graphene-oxide                                   | [EMIM] <sup>+</sup> [BF <sub>4</sub> ] <sup>-</sup><br>37.5 wt%                 | 1.5                 | 0.1            | 1.27               | 2                   | 0.28                | 168                                 |
| Covalent organic frameworks<br>(COF-DT-SO <sub>3</sub> Na) [S11] | PEDOT:PSS                                                                 | -                                                                               | 0.5                 | 0.1            | 0.39               | 0.5 <sup>d</sup>    | 1.2                 | 1667                                |

2

1 <sup>a</sup>: Normalized force ( $F_{\text{Nor.}}$ ) is calculated using the following equation [S1]  $F_{\text{Nor.}} = F_{\text{exp.}}l/wt^2$ ,  
2 where  $F_{\text{exp.}}$  is the measuring blocking force,  $w$ ,  $t$ , and  $l$  are the width, thickness, and free  
3 length of the actuator, respectively.

4 <sup>b,c,d</sup>: blocking force was measuring under applying AC voltage.

5

## 6 **5. References**

- 7 [S1] C.-H. Wu, W. Meng and M. Yoshio, Low-voltage-driven actuators using photo-cross-  
8 linked ionic columnar liquid-crystalline polymer films, *ACS Mater. Lett.*, 2022, **4**, 153–158.
- 9 [S2] C.-H. Wu, W. Meng, K. Iakoubovskii and M. Yoshio, Photocured liquid-crystalline  
10 polymer electrolytes with 3D ion transport pathways for electromechanical actuators, *ACS*  
11 *Appl. Mater. Interfaces*, 2023, **15**, 4495–4504.
- 12 [S3] S. Cao, J. Aimi and M. Yoshio, Electroactive soft actuators based on columnar ionic  
13 liquid crystal/polymer composite membrane electrolytes forming 3D continuous ionic  
14 channels, *ACS Appl. Mater. Interfaces*, 2022, **14**, 43701–43710.
- 15 [S4] Y.-X. Shi, Y. Wu, S.-Q. Wang, Y.-Y. Zhao, T. Li, X.-Q. Yang and T. Zhang, Soft  
16 electrochemical actuators with a two-dimensional conductive metal–organic framework  
17 nanowire array, *J. Am. Chem. Soc.*, 2021, **143**, 4017–4023.
- 18 [S5] F. Wang, Z. Jin, S. Zheng, H. Li, S. Cho, H.J. Kim, S.-J. Kim, E. Choi, J.-O. Park and  
19 S. Park, High-fidelity bioelectronic muscular actuator based on porous carboxylate bacterial  
20 cellulose membrane, *Sens. Actuators B*, 2017, **250**, 402–411.
- 21 [S6] O. Kim, H. Kim, U.H. Choi and M.J. Park, One-volt-driven superfast polymer actuators  
22 based on single-ion conductors, *Nat. Commun.*, 2016, **7**, 13576.
- 23 [S7] J. Nam, T. Hwang, K. J. Kim and D.-C. Lee, A new high-performance ionic polymer–  
24 metal composite based on Nafion/polyimide blends, *Smart Mater. Struct.*, 2017, **26**, 035015.
- 25 [S8] S. Imaizumi, Y. Ohtsuki, T. Yasuda, H. Kokubo and M. Watanabe, Printable polymer  
26 actuators from ionic liquid, soluble polyimide, and ubiquitous carbon materials, *ACS Appl.*  
27 *Mater. Interfaces*, 2013, **5**, 6307–6315.
- 28 [S9] S.Y. Kim, Y. Kim, C. Cho, H. Choi, H.W. Park, D. Lee, E. Heo, S. Park, H. Lee and  
29 D.H. Kim, Deformable ionic polymer artificial mechanotransducer with an interpenetrating  
30 nanofibrillar network, *ACS Appl. Mater. Interfaces*, 2019, **11**, 29350–29359.
- 31 [S10] M.T. Manzoor, V.H. Nguyen, S. Umrao, J.H. Kim, R. Tabassian, J.E. Kim and I.K.

- 1 Oh, Mutually exclusive p-type and n-type hybrid electrode of MoS<sub>2</sub> and graphene for  
2 artificial soft touch fingers, *Adv. Funct. Mater.*, 2019, **29**, 1905454.
- 3 [S11] F. Yu, J.-H. Ciou, S. Chen, W.C. Poh, J. Chen, J. Chen, K. Haruethai, J. Lv, D. Gao  
4 and P.S. Lee, Ionic covalent organic framework based electrolyte for fast-response ultra-low  
5 voltage electrochemical actuators, *Nat. Commun.*, 2022, **13**, 390.
- 6
